# Supplementary material
Source: PubMed Central journal article supplement (PMC3517234)
Supplement: supp_tpc.112.102384_tpc102384Supplemental.pdf [file supp_tpc.112.102384_tpc102384Supplemental.pdf]

**Supplemental Figure 1.** Alignment of ZIX C-terminus with the Ataxin-10 related domain pfam09759 of other eukaryotes

Red residues: highly conserved, blue residues: moderately conserved.

|                              |     |                                                                                                 |     |                                                       |    |    |    |    |    |  |
|------------------------------|-----|-------------------------------------------------------------------------------------------------|-----|-------------------------------------------------------|----|----|----|----|----|--|
|                              |     | 10                                                                                              | 20  | 30                                                    | 40 | 50 | 60 | 70 | 80 |  |
|                              |     | .....*..... .....*..... .....*..... .....*..... .....*..... .....*..... .....*..... .....*..... |     |                                                       |    |    |    |    |    |  |
| ZIX                          | 372 | GFRRDIVSVIGNCAYRRKEVQDEIRERDG-LFLMLQQCVTDDENPFLREWGLWCIRNLLLEGNPENQEVVAELEIKGS--V               | 448 |                                                       |    |    |    |    |    |  |
| <a href="#">gi 122016228</a> | 197 | GYRTEHMRLMANLTLDNVEACSFIVSNSALLAAVLTSTRFDEENPGMVEWAEFCIRNLCCTKEAHEKIRRLMPVGIsdE                 | 276 |                                                       |    |    |    |    |    |  |
| <a href="#">gi 1351646</a>   | 324 | GVKRECVRFIAFICSKFSTAPDLVRHFNG-VALIISQANYDDWNPYIREISVLCRLLQNNIENQKIIGGLTPITT--T                  | 400 |                                                       |    |    |    |    |    |  |
| <a href="#">gi 74670950</a>  | 807 | NLKKLVVLVLSLWKCPEVQDQIRRHGG-VETILSCTNFDAHNPYIKEHAVMCLKFLLEGNRENQKLVEALEAREVvrD                  | 885 |                                                       |    |    |    |    |    |  |
| <a href="#">gi 74606966</a>  | 420 | GIKCFLVELLGFMSYEQKDVQDSVRELHG-LELVLSNCIIIDNPNPFIKERICICIRYLLANNSTNQEFISQLEAKKA--V               | 496 |                                                       |    |    |    |    |    |  |
| <a href="#">gi 74695766</a>  | 419 | ECKSLIIIEILGFLT YKNREVQDKCRELHG-LELVLSNCVIDDNDPFIKERSIMCIRFLLKDNKENQNFVANLESKRV--A              | 503 |                                                       |    |    |    |    |    |  |
| <a href="#">gi 74608914</a>  | 427 | ECKLLIIIEIIAMLT HENREIQNQVRELGG-LGVILSNCVIDDNDPFIKERSIMCIRFLLKDNKENQNFVANLESKRV--A              | 503 |                                                       |    |    |    |    |    |  |
| <a href="#">gi 140514</a>    | 445 | HCKLVIIEILASLVYAHPEIQDQIRELGG-LALILSNCVIDDNDPFIKERSIVCLKFLKKNNAKNQEVVKMEAQDV--V                 | 521 |                                                       |    |    |    |    |    |  |
| <a href="#">gi 74627407</a>  | 363 | SVKTNIIITILSYLSYDSFQFQEKIRELGG-LSLVLSNCIIIDNPNPFIKERQAIIVCLKYLLQKNPKNQQFVADLEAKKV--V            | 439 |                                                       |    |    |    |    |    |  |
| <a href="#">gi 74601194</a>  | 381 | QVKSLIIIEVIAFLVHGSFEIQEKMRELHG-LELVLSNCMIIDNNDPFIKERAIIVCVKFLLANNEKNQQFVADLEAKQT--V             | 457 |                                                       |    |    |    |    |    |  |
| <a href="#">gi 75151733</a>  | 361 | GYRRDVVAVIANCLHRSKVKQDEVRLHDG-IILLLQQCVVDEENPYLREWGLFAVKNLLEGNNEENQKEVSGLKMQEA--V               | 437 |                                                       |    |    |    |    |    |  |
| <a href="#">gi 74858970</a>  | 499 | GFKIELIRILGNLSYKNRGNQDEIRELGG-IEIILNHCRFDVNNPYIKESVFAIRNLCEDNVENQNLIESLKVKGV--A                 | 575 |                                                       |    |    |    |    |    |  |
| <a href="#">gi 82178990</a>  | 379 | GFKAHLIRLIGNLICYQNKENQEKVYQLDG-IALILDNCSIDNPNPFLNQWAVFAIRNLTENNNDKNQELIASMERQGL--A              | 455 |                                                       |    |    |    |    |    |  |
| <a href="#">gi 122144951</a> | 369 | GFKSHLIRLIGNLICYKNKDNQDKVNELDG-IPLILDNCSIDNPNPFLNQWAVFAIRNLTENNNDKNQELIASMERQGL--A              | 445 |                                                       |    |    |    |    |    |  |
| <a href="#">gi 122093877</a> | 348 | SLKSSLVKALVNLSYKNKKNQNLARDMQI-MAAILECTNLDARNPLIKESVILAIRNLCDDNLENQKVASLTKVGD--A                 | 424 |                                                       |    |    |    |    |    |  |
| <a href="#">gi 74685004</a>  | 431 | NLKRDLVRLLGVLTFNDTRVGDQVREYEG-VQLVLSLSTEIDEGNPFLREHALFCIRNLMMLNPNANQAIKEMDPVGV---               | 506 |                                                       |    |    |    |    |    |  |
| <a href="#">gi 74830132</a>  | 196 | GFRRHVRLVANLTYENKEVCSAVLGDTRLTLTAI LGATRIDLENPGMGEWATFVIRNLCYCSNEAREILRGLTPISIV-E               | 274 |                                                       |    |    |    |    |    |  |
| <a href="#">gi 75036035</a>  | 198 | GFKTECMRLIANLTHNNVDVNAALVERDTfLNFNLSATQIDEENPGMVEWAEFALRNICESAAAREKIRKLAPQGV--T                 | 275 |                                                       |    |    |    |    |    |  |
| <a href="#">gi 122160642</a> | 468 | GYRVDLIAIIGNASFNRAQVCDLVVSLGG-VPMVLNHTRGEDGEAYLREWALWAVRNMTEVSDAARQKIEIQPQAV--E                 | 544 |                                                       |    |    |    |    |    |  |
| <a href="#">gi 24654554</a>  | 255 | ELKTLVRCANLLYDNKANKGYCLDTQL-LPTLLECTTMDARNPLMREWSILAIRNACINCPEAQQVIAGLTMQGS--A                  | 331 |                                                       |    |    |    |    |    |  |
|                              |     | 90                                                                                              | 100 |                                                       |    |    |    |    |    |  |
|                              |     | .....*..... .....*..... .....*.....                                                             |     |                                                       |    |    |    |    |    |  |
| ZIX                          | 449 | DVPQLREIGLRVEIDPKtARPKLVNd                                                                      | 474 | (Arabidopsis thaliana)                                |    |    |    |    |    |  |
| <a href="#">gi 122016228</a> | 277 | SKELLSSGRVDCHLNSE-GKLVLSNP                                                                      | 301 | (Trypanosoma cruzi)                                   |    |    |    |    |    |  |
| <a href="#">gi 1351646</a>   | 401 | HSDALEEAGFTSYINDK-GKVVLQPK                                                                      | 425 | (Saccharomyces pombe)                                 |    |    |    |    |    |  |
| <a href="#">gi 74670950</a>  | 886 | ENGLLERSGFEAVIDKT-GKLAIRPK                                                                      | 910 | (Aspergillus fumigates)                               |    |    |    |    |    |  |
| <a href="#">gi 74606966</a>  | 497 | DGDVLKKAGYKVDIDGK-GNIKLTAD                                                                      | 521 | (Kluyveromyces lactis)                                |    |    |    |    |    |  |
| <a href="#">gi 74695766</a>  | 496 | NDDVLAEEAGYEVKVGAD-GKIGLTKN                                                                     | 520 | (Eremothecium gossypii) (Ashbya gossypii)             |    |    |    |    |    |  |
| <a href="#">gi 74608914</a>  | 504 | NDETLEAGYEVDISKD-GKLSLKST                                                                       | 528 | (Candida glabrata)                                    |    |    |    |    |    |  |
| <a href="#">gi 140514</a>    | 522 | QDDALSKAGFEISVEKG-GKVRVLSK                                                                      | 546 | (Saccharomyces cerevisiae)                            |    |    |    |    |    |  |
| <a href="#">gi 74627407</a>  | 440 | DDQVLSEVGQVEV-ID-GKVAVKRK                                                                       | 463 | (Candida albicans)                                    |    |    |    |    |    |  |
| <a href="#">gi 74601194</a>  | 458 | DDDALKEVGYEVI-ED-GNVKLRKT                                                                       | 481 | (Debaryomyces hansenii)                               |    |    |    |    |    |  |
| <a href="#">gi 75151733</a>  | 438 | ITPEIADIGLRVEIDKEtGHPKLVNN                                                                      | 463 | (Oryza sativa)                                        |    |    |    |    |    |  |
| <a href="#">gi 74858970</a>  | 576 | NNDELKDLGLEVGVTEN-GTIKFKNV                                                                      | 600 | (Dictyostelium discoideum)                            |    |    |    |    |    |  |
| <a href="#">gi 82178990</a>  | 456 | DSSLLKSMGLQAEERD-GKLLLKSV                                                                       | 479 | (Xenopus (Silurana) tropicalis)                       |    |    |    |    |    |  |
| <a href="#">gi 122144951</a> | 446 | DASLLKMGFEVEK-RG-DKLILKST                                                                       | 469 | (Bos Taurus)                                          |    |    |    |    |    |  |
| <a href="#">gi 122093877</a> | 425 | ENSLLTEYNSAG-----GTIRIKDS                                                                       | 444 | (Aedes aegypti) (Stegomyia aegypti)                   |    |    |    |    |    |  |
| <a href="#">gi 74685004</a>  | 507 | ----LSETGELLPV--P-DKMKKKSI                                                                      | 525 | (Filobasidiella neoformans) (Cryptococcus neoformans) |    |    |    |    |    |  |
| <a href="#">gi 74830132</a>  | 275 | EAEDELFGKAVDPHATPE-GRSAMEPL                                                                     | 299 | (Trypanosoma brucei)                                  |    |    |    |    |    |  |
| <a href="#">gi 75036035</a>  | 276 | DQSREILAGRCSYSFSStGKVQLHTQ                                                                      | 301 | (Leishmania major)                                    |    |    |    |    |    |  |
| <a href="#">gi 122160642</a> | 545 | ESEELLAKGLDVELNREtGRPRVVKR                                                                      | 570 | (Ostreococcus tauri)                                  |    |    |    |    |    |  |
| <a href="#">gi 24654554</a>  | 332 | PNDILTELNLDM-----GALRISDR                                                                       | 351 | (Drosophila melanogaster)                             |    |    |    |    |    |  |

**Supplemental Figure 2.** Predicted secondary structure of ZIX by HHpred based on sequence alignment with proteins of known structures.

Six representative hits (1, 3, 5, 21, 22, 23) were selected to show secondary structure alignment below the graphic presentation.

**Query** ZIX (seq=MEASLP EEVL...TARPKLVNDT Len=475 Neff=4.0 Nseqs=45)

**Parameters** score SS:yes search:local realign with MAP:no

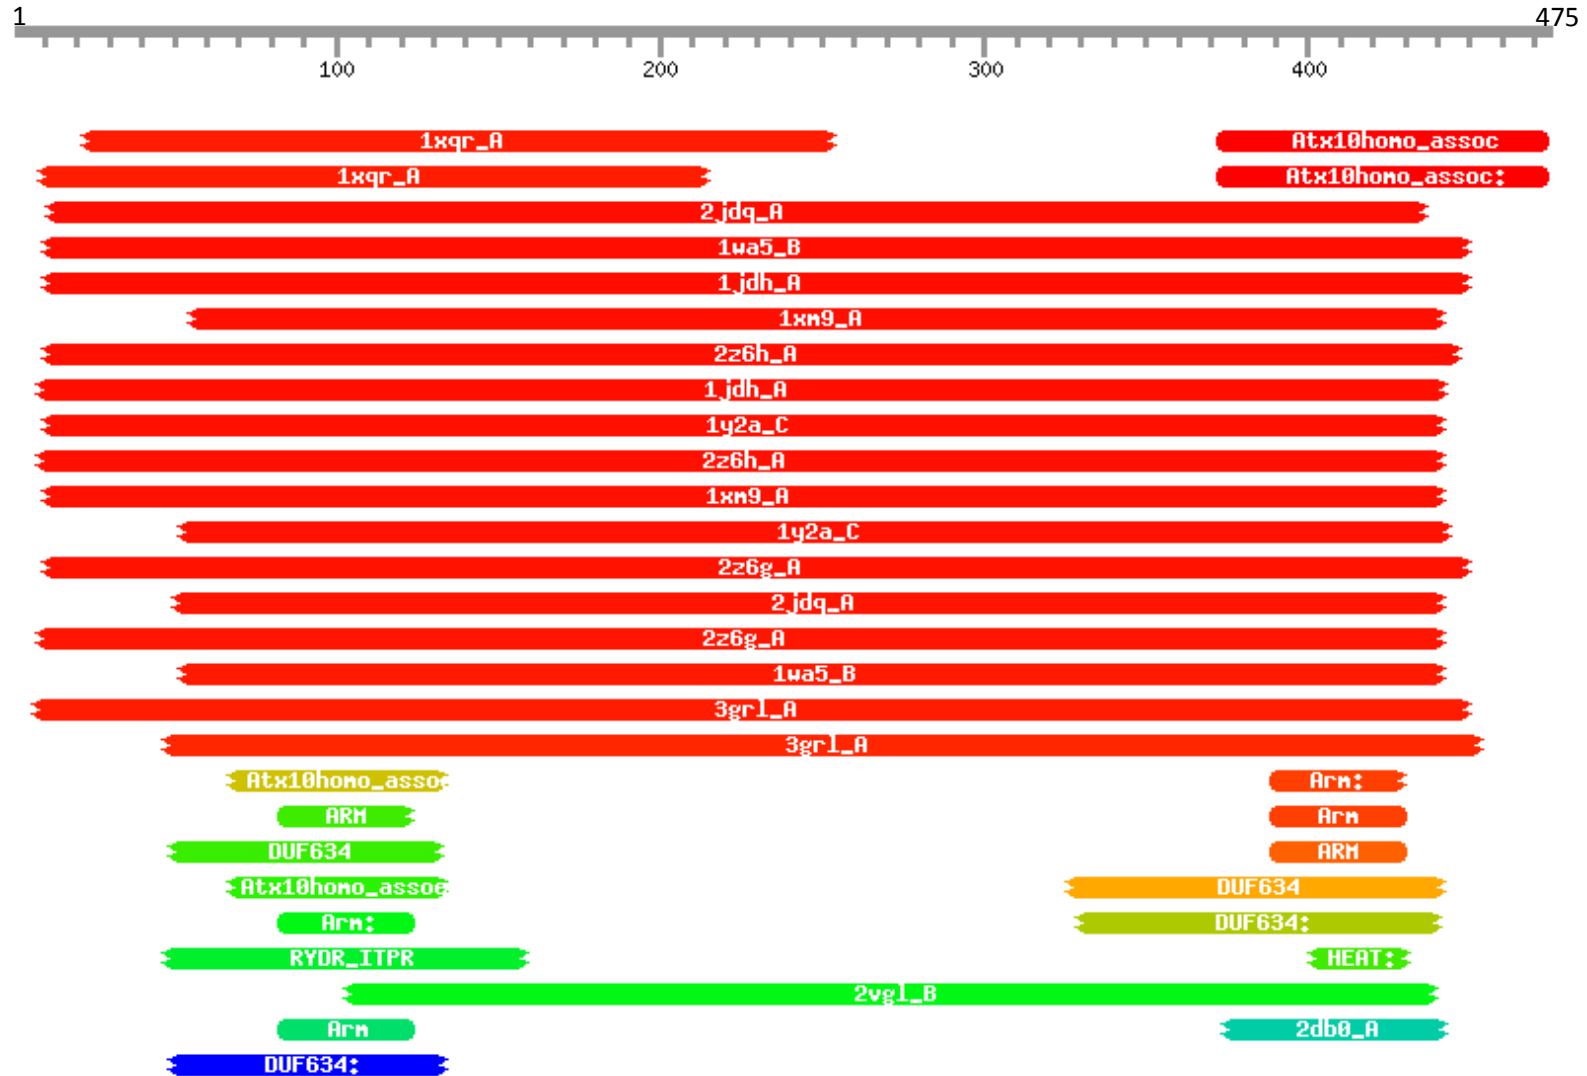

Supplemental Data. Ngo et al. (2012). Plant Cell 10.1105/tpc.112.102384

| No Hit                      | Prob                    | E-value                 | P-value | Score   | SS      | Cols  | Query | HMM | Template | HMM           |
|-----------------------------|-------------------------|-------------------------|---------|---------|---------|-------|-------|-----|----------|---------------|
| <input type="checkbox"/> 1  | pfam09759               | Atx10homo_assoc Spin    | 100.0   | 7.7E-42 | 0       | 294.8 | 11.0  | 102 | 372-474  | 1-102 (102)   |
| <input type="checkbox"/> 2  | <a href="#">PF09759</a> | Atx10homo_assoc: Spin   | 100.0   | 9.8E-40 | 2.2E-44 | 283.0 | 8.9   | 103 | 372-474  | 1-105 (105)   |
| <input type="checkbox"/> 3  | <a href="#">2jdg A</a>  | Importin alpha-1 subuni | 98.9    | 2E-06   | 4.6E-11 | 85.7  | 27.7  | 324 | 11-436   | 23-353 (450)  |
| <input type="checkbox"/> 4  | <a href="#">lwa5 B</a>  | Importin alpha subunit; | 98.8    | 1.1E-06 | 2.6E-11 | 90.1  | 25.0  | 341 | 10-449   | 89-431 (530)  |
| <input type="checkbox"/> 5  | <a href="#">ljdh A</a>  | Beta-catenin; beta-cate | 98.8    | 8.3E-07 | 1.9E-11 | 90.0  | 21.7  | 337 | 10-449   | 22-358 (529)  |
| <input type="checkbox"/> 6  | <a href="#">lxm9 A</a>  | Plakophilin 1; armadill | 98.7    | 4.3E-07 | 1E-11   | 86.9  | 16.3  | 355 | 55-441   | 7-370 (457)   |
| <input type="checkbox"/> 7  | <a href="#">2z6h A</a>  | Catenin beta-1, beta-ca | 98.7    | 1.6E-06 | 3.6E-11 | 92.2  | 21.2  | 334 | 10-446   | 19-352 (644)  |
| <input type="checkbox"/> 8  | <a href="#">ljdh A</a>  | Beta-catenin; beta-cate | 98.7    | 1.1E-05 | 2.6E-10 | 81.8  | 25.3  | 407 | 8-442    | 62-500 (529)  |
| <input type="checkbox"/> 9  | <a href="#">ly2a C</a>  | SRP1-alpha, importin al | 98.6    | 5.4E-05 | 1.3E-09 | 73.4  | 26.7  | 330 | 10-441   | 9-349 (428)   |
| <input type="checkbox"/> 10 | <a href="#">2z6h A</a>  | Catenin beta-1, beta-ca | 98.6    | 1.4E-05 | 3.2E-10 | 85.0  | 23.5  | 408 | 8-441    | 59-496 (644)  |
| <input type="checkbox"/> 11 | <a href="#">lxm9 A</a>  | Plakophilin 1; armadill | 98.5    | 4.3E-05 | 1E-09   | 73.2  | 21.6  | 387 | 10-441   | 7-417 (457)   |
| <input type="checkbox"/> 12 | <a href="#">ly2a C</a>  | SRP1-alpha, importin al | 98.4    | 0.00018 | 4.1E-09 | 69.8  | 25.4  | 299 | 52-443   | 9-308 (428)   |
| <input type="checkbox"/> 13 | <a href="#">2z6g A</a>  | B-catenin; FULL-length, | 98.4    | 1.7E-05 | 3.9E-10 | 87.2  | 20.3  | 337 | 10-449   | 155-491 (780) |
| <input type="checkbox"/> 14 | <a href="#">2jdg A</a>  | Importin alpha-1 subuni | 98.2    | 0.00068 | 1.6E-08 | 67.7  | 23.4  | 295 | 50-441   | 20-316 (450)  |
| <input type="checkbox"/> 15 | <a href="#">2z6g A</a>  | B-catenin; FULL-length, | 98.1    | 0.00062 | 1.4E-08 | 75.0  | 23.2  | 406 | 8-441    | 192-632 (780) |
| <input type="checkbox"/> 16 | <a href="#">lwa5 B</a>  | Importin alpha subunit; | 97.8    | 0.0028  | 6.6E-08 | 65.3  | 21.3  | 293 | 52-441   | 89-381 (530)  |
| <input type="checkbox"/> 17 | <a href="#">3grl A</a>  | General vesicular trans | 97.6    | 0.018   | 4.1E-07 | 63.7  | 25.1  | 359 | 7-449    | 24-413 (651)  |
| <input type="checkbox"/> 18 | <a href="#">lxqr A</a>  | HSPBP1 protein; armadil | 97.6    | 0.0017  | 4E-08   | 63.1  | 15.0  | 225 | 22-253   | 56-291 (296)  |
| <input type="checkbox"/> 19 | <a href="#">lxqr A</a>  | HSPBP1 protein; armadil | 97.5    | 0.0026  | 6.1E-08 | 61.8  | 14.9  | 200 | 9-214    | 86-289 (296)  |
| <input type="checkbox"/> 20 | <a href="#">3grl A</a>  | General vesicular trans | 96.8    | 0.023   | 5.4E-07 | 62.7  | 14.8  | 325 | 47-453   | 21-365 (651)  |
| <input type="checkbox"/> 21 | <a href="#">PF00514</a> | Arm: Armadillo/beta-c   | 94.7    | 0.065   | 1.5E-06 | 37.3  | 4.6   | 40  | 388-429  | 1-40 (41)     |
| <input type="checkbox"/> 22 | pfam00514               | Arm Armadillo/beta-c    | 94.6    | 0.062   | 1.5E-06 | 37.7  | 4.4   | 41  | 388-430  | 1-41 (41)     |
| <input type="checkbox"/> 23 | smart00185              | ARM Armadillo/beta-     | 91.9    | 0.28    | 6.6E-06 | 34.4  | 4.1   | 41  | 388-430  | 1-41 (41)     |







Supplemental Data. Ngo et al. (2012). Plant Cell 10.1105/tpc.112.102384

```

Q ss_pred          ccCCCCHHHHHHHHHHHHHHhCCHHHHHHHHHhCccccCcC
Q ZIX              410 TDDENPFLREWGLWCIRNLLLEGNPENQEVVAELEIKGSVD 449 (475)
Q Consensus        410 ~D~Np~lreW~i~aiRnL~e~n~nQ~Ia~le~qg~ 449 (475)
                   .+..++-+++..+++++|++..++..+....-.....|.++
T Consensus        319 ~~~~~v~~~a~~aL~~L~~~~~i~~~~~ 358 (529)
T ljdh_A           319 RAGDREDITEPAICALRHILTSRHQEAEMAQNAVRLHYGLP 358 (529)
T ss_dssp          HHTTCHHHHHHHHHHHHHHTSSSTTHHHHHHHHHHTCCHH
T ss_pred          hhhhhhhhHHHHHHHHhhhhccccchhhhhhhHHhccCch

```

No 21

>[PF00514](#) Arm: Armadillo/beta-catenin-like repeat; InterPro: The armadillo (Arm) repeat is an approximately 40 amino acid long tandemly repeated sequence motif first identified in the Drosophila melanogaster segment polarity gene armadillo involved in signal transduction through wingless. Animal Arm-repeat proteins function in various processes, including intracellular signalling and cytoskeletal regulation, and include such proteins as beta-catenin, the junctional plaque protein plakoglobin, the adenomatous polyposis coli (APC) tumour suppressor protein, and the nuclear transport factor importin-alpha, amongst others . A subset of these proteins is conserved across eukaryotic kingdoms. In higher plants, some Arm-repeat proteins function in intracellular signalling like their mammalian counterparts, while others have novel functions . The 3-dimensional fold of an armadillo repeat is known from the crystal structure of beta-catenin, where the 12 repeats form a superhelix of alpha helices with three helices per unit . The cylindrical structure features a positively charged groove, which presumably interacts with the acidic surfaces of the known interaction partners of beta-catenin. ; PDB: [2bct](#) [1jpp](#) [A](#) [li7x](#) [C](#) [lmle](#) [A](#) [li7w](#) [A](#) [3bct](#) [1v18](#) [A](#) [1jpw](#) [B](#) [1th1](#) [B](#) [1qz7](#) [A](#) ....  
Probab=94.70 E-value=0.065 Score=37.34 Aligned\_cols=40 Identities=20% Similarity=0.281 Sum\_probs=0.0

```

Q ss_pred          ChhhHHHHHhCCcHHHHhCccCCCHHHHHHHHHHHHHh
Q ZIX              388 RKEVQDEIRERDGLFLMLQQCVTDDENPFLREWGLWCIRNLL 429 (475)
Q Consensus        388 ~~~~qd~vr~l~Gi~liL~c~D~Np~lreW~i~aiRnL~ 429 (475)
                   +++++..+..+..+|||.+++.=. .+|-+++|=..|++|++
T Consensus        1 ~~~~~i~~~g~i~~l~~L~~~~~v~~~a~~~L~nl~ 40 (41)
T PF00514_consens 1 SPENRQAITI EAGALPALVQLLK--SSDEEVQENAAWALS NLA 40 (41)
T ss_dssp          SHHHHHHHHTTTHHHHHHHHTT--SSSHHHHHHHHHHHHH
T ss_pred          CcHHHHHHHhCCcHHHHHHhC--CCCHHHHHHHHHHHhC

```

No 22

>[pfam00514](#) Arm Armadillo/beta-catenin-like repeat. Approx. 40 amino acid repeat. Tandem repeats form super-helix of helices that is proposed to mediate interaction of beta-catenin with its ligands. CAUTION: This family does not contain all known armadillo repeats.  
Probab=94.62 E-value=0.062 Score=37.72 Aligned\_cols=41 Identities=20% Similarity=0.262 Sum\_probs=0.0

```

Q ss_pred          ChhhHHHHHhCCcHHHHhCccCCCHHHHHHHHHHHHHh
Q ZIX              388 RKEVQDEIRERDGLFLMLQQCVTDDENPFLREWGLWCIRNLL 430 (475)
Q Consensus        388 ~~~~qd~vr~l~Gi~liL~c~D~Np~lreW~i~aiRnL~e 430 (475)
                   +++++..+..+..+|||.+.+.+. .+~+~+~+~+~+..|++|+|.
T Consensus        1 ~~~~~v~~~g~v~~Lv~lL~~~~~v~~~a~~aL~nL~ 41 (41)
T pfam00514       1 SPENKQAVIEAGALPPLVQLLS--SPDEEVQEEAAWALS NLA 41 (41)
T ss_pred          CcHHHHHHHhCCcHHHHHHhC--CCcHhHHHHHHHHHHhC

```





**Supplemental Figure 3.** Identification of Arm repeats in ZIX

Putative ZIX Arm repeat motifs were aligned with known Arm repeats of two proteins with crystal 3-D structure (yeast importin- $\alpha$  and mouse  $\beta$ -catenin) and with the consensus pfam00514 and smart00185 protein domains.

| H1                                               | H2                    | H3                |           |
|--------------------------------------------------|-----------------------|-------------------|-----------|
| <b>Yeast importin-<math>\alpha</math> (SRP1)</b> |                       |                   |           |
| HRPPIDVVI                                        | QAGV VPRLVEFMR-ENQP   | EMLQLEAAWALTNIA   |           |
| TSAQTKVVV                                        | DADA-VPLFIQLLY--TGS   | VEVKEQAIWALGNVA   |           |
| DSTDYRDYV                                        | LQCNAM EPIILGLFN--SNK | PSLIR TATWTL SNLC |           |
| PQEAIQAVI                                        | DVR-IPKRLVELLS--HES   | TLVQTPALRAVGNIV   |           |
| NDLQTQVVI                                        | NAG-VLPALRLLLS--SPK   | ENIKKEACWTISNIT   |           |
| NTEQIQAVI                                        | DANL-IPPLVKLLEV--AE   | YKTKKEACWALSNAS   |           |
| RPDIIRYLV                                        | SQG-CIKPLCDLLEIA--D   | NRIIEVTLDALENIL   |           |
| <b>Mouse <math>\beta</math>-catenin</b>          |                       |                   |           |
| NYQDDAELA                                        | TR--AIP ELTKLLN--DED  | QVVVNKAAVMVHQLS   |           |
| KEASRHAIM                                        | RSPQM VSAIVR TMQ-NTND | VE TARCTAGT LHNLS |           |
| CSSNKPAIV                                        | EAG-GMQALGLHLT--DPS   | QRLVQNC LWT LRNLS |           |
| NQESKLIIL                                        | ASG-GPQALVNIMR-TYTY   | EKLLWTT SRVLKVL S |           |
| DKEAAEAIE                                        | AEG-ATAPL TELLH--SRN  | EGVATYAAAVLFRMS   |           |
| QEGAKMAVR                                        | LAG-GLQKMVALLN--KTN   | VKFLAITTDCLQILA   |           |
| AEMAQNAV R                                       | LHY-GLPVVKLLH-PPSH    | WPLIKATVGLIRNLA   |           |
| HREGLLAIF                                        | KSG-GIPALVKMLG--SPV   | DSVLFYAITTLHNLL   |           |
| NYKNKMMVC                                        | QVG-GIEALVRTVLRAGDR   | EDITEPAICALRHLLT  |           |
| CPANHAPLR                                        | EQG-AIPRLVQLLV RGVRM  | EEIVEGCTGALHILA   |           |
| <b>pfam00514</b>                                 |                       |                   |           |
| SPENRQAI I                                       | EAG-AIPALVQLLK--SSD   | EEVQENAAWALS NL   |           |
| <b>smart00185</b>                                |                       |                   |           |
| DEKQQAVVD                                        | AG--GLPALV ELLK--SED  | EEVVKEAAWALS NLS  |           |
| <b>ZIX</b>                                       |                       |                   |           |
| SDLASKSIL                                        | P---SILRLIQLLP-YPSS   | RHYLNLSLKVLRNLC   | (33-79)   |
| VSNQNSFVD                                        | HD--GSAIVSDLLDSA IAD  | FETVRFGLQVLANVV   | (83-122)  |
| RKEVQDEIR                                        | ERD-GLFLMLQQCVTD DEN  | PFLEWGLWCIRNLL    | (388-429) |

The three helices of Arm repeats were designated as H1, H2, and H3. The amino acid positions of three putative ZIX Arm repeat motifs were given in parentheses. Color codes for amino acid residues: blue: aliphatic; green: basic; red: acidic; gray shade: conserved amino acid.

**Supplemental Figure 4.** Two top 3-D thread models of ZIX predicted by I-TASSER using proteins of known crystallized structures. **A** and **B**: predicted 3-D models of ZIX. **C**: crystal structure of yeast importin- $\alpha$  (SRP1) complexed with c-myc NLS peptide (1ee4). **D**: crystal structure of human  $\beta$ -catenin Arm repeat region and C-terminus (2z6h).

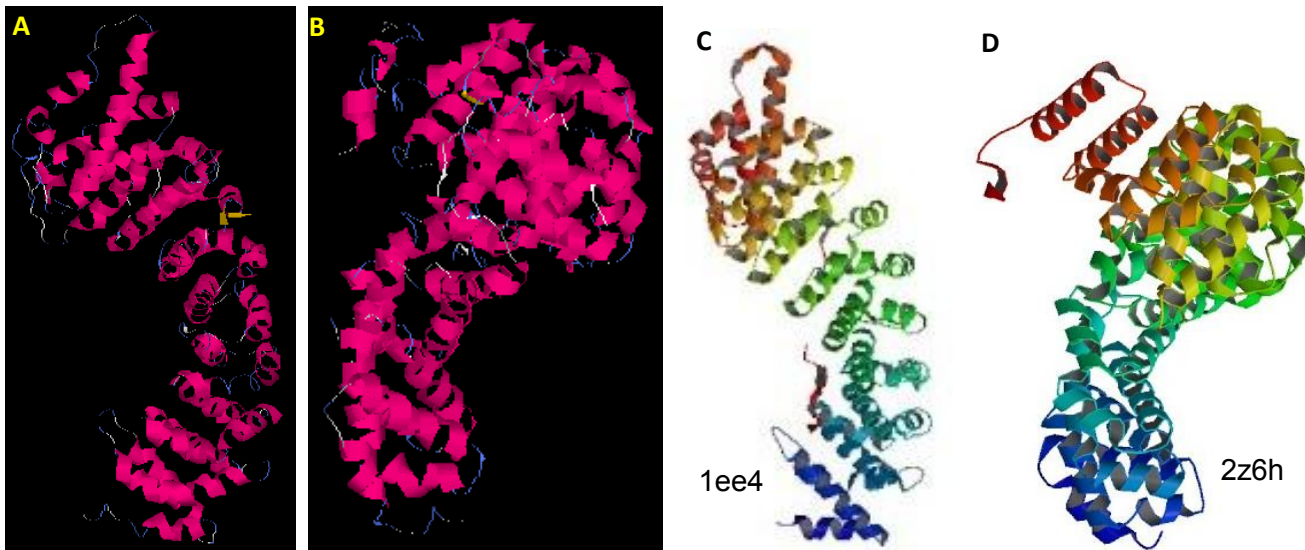

**Supplemental Figure 5.** Expression data of ZIX transcripts and proteins from public databases

**A.** ZIX spatial expression data were extracted from Genevestigator v3. The x-axis indicates expression levels.

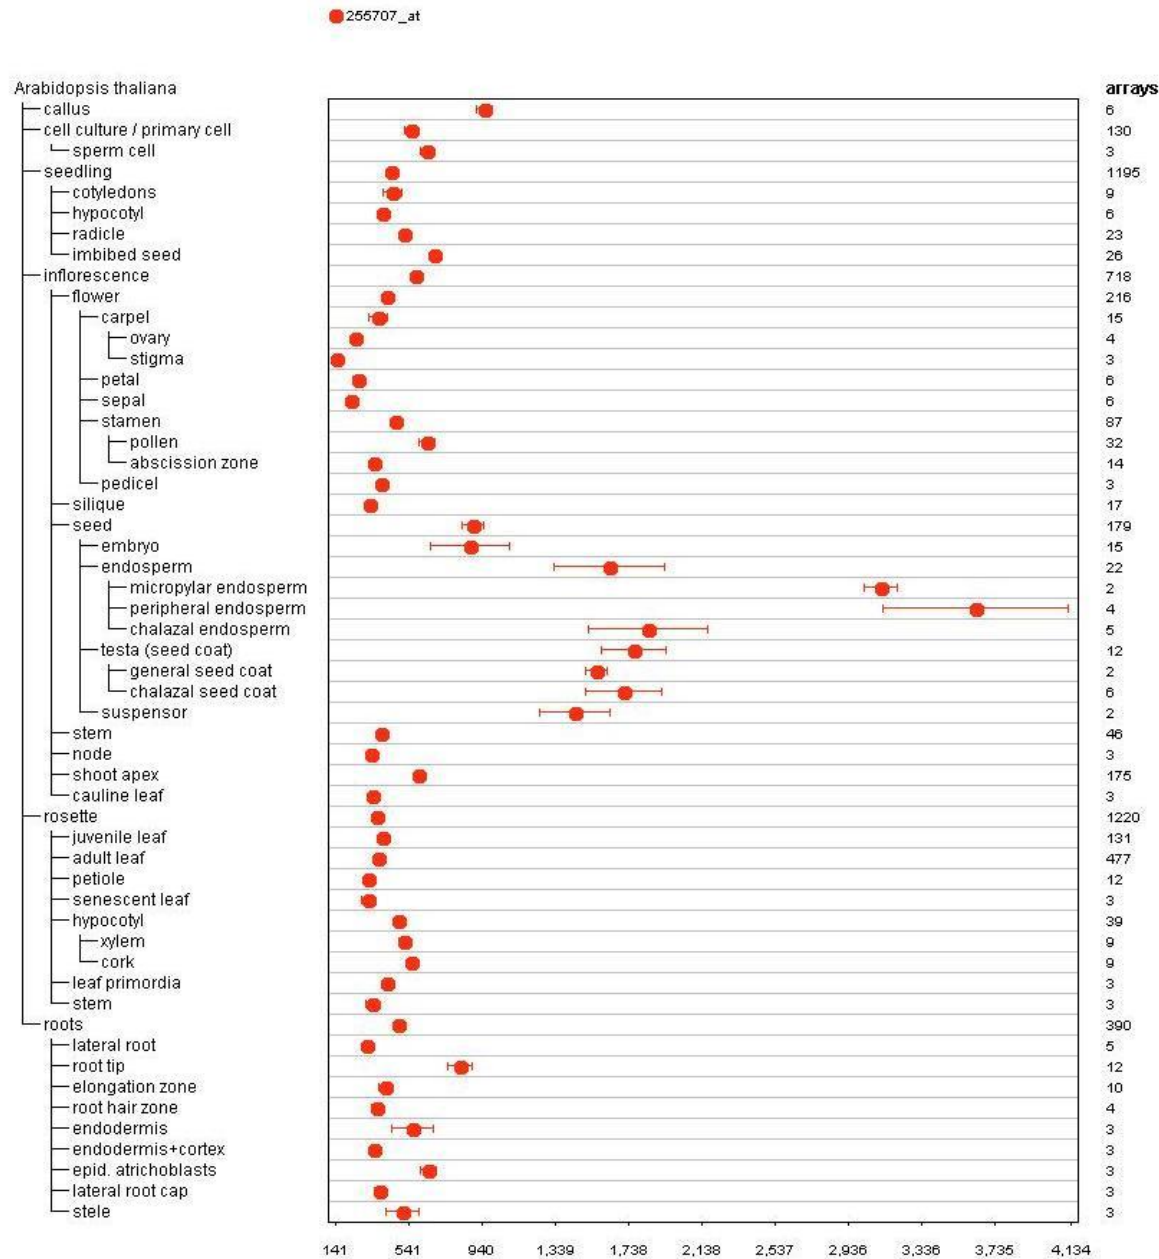

B. ZIX developmental expression data were extracted from Genevestigator v3. The y-axis indicates expression levels.

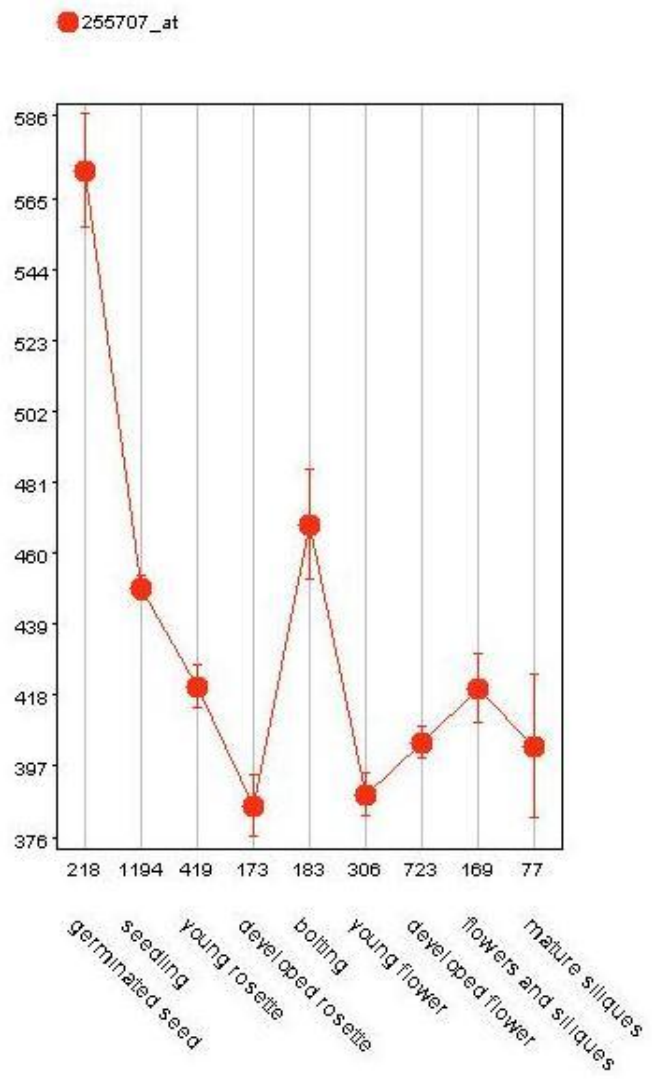

C. ZIX protein expression data were extracted from AtProteom. Two peptides were detected from roots and siliques.

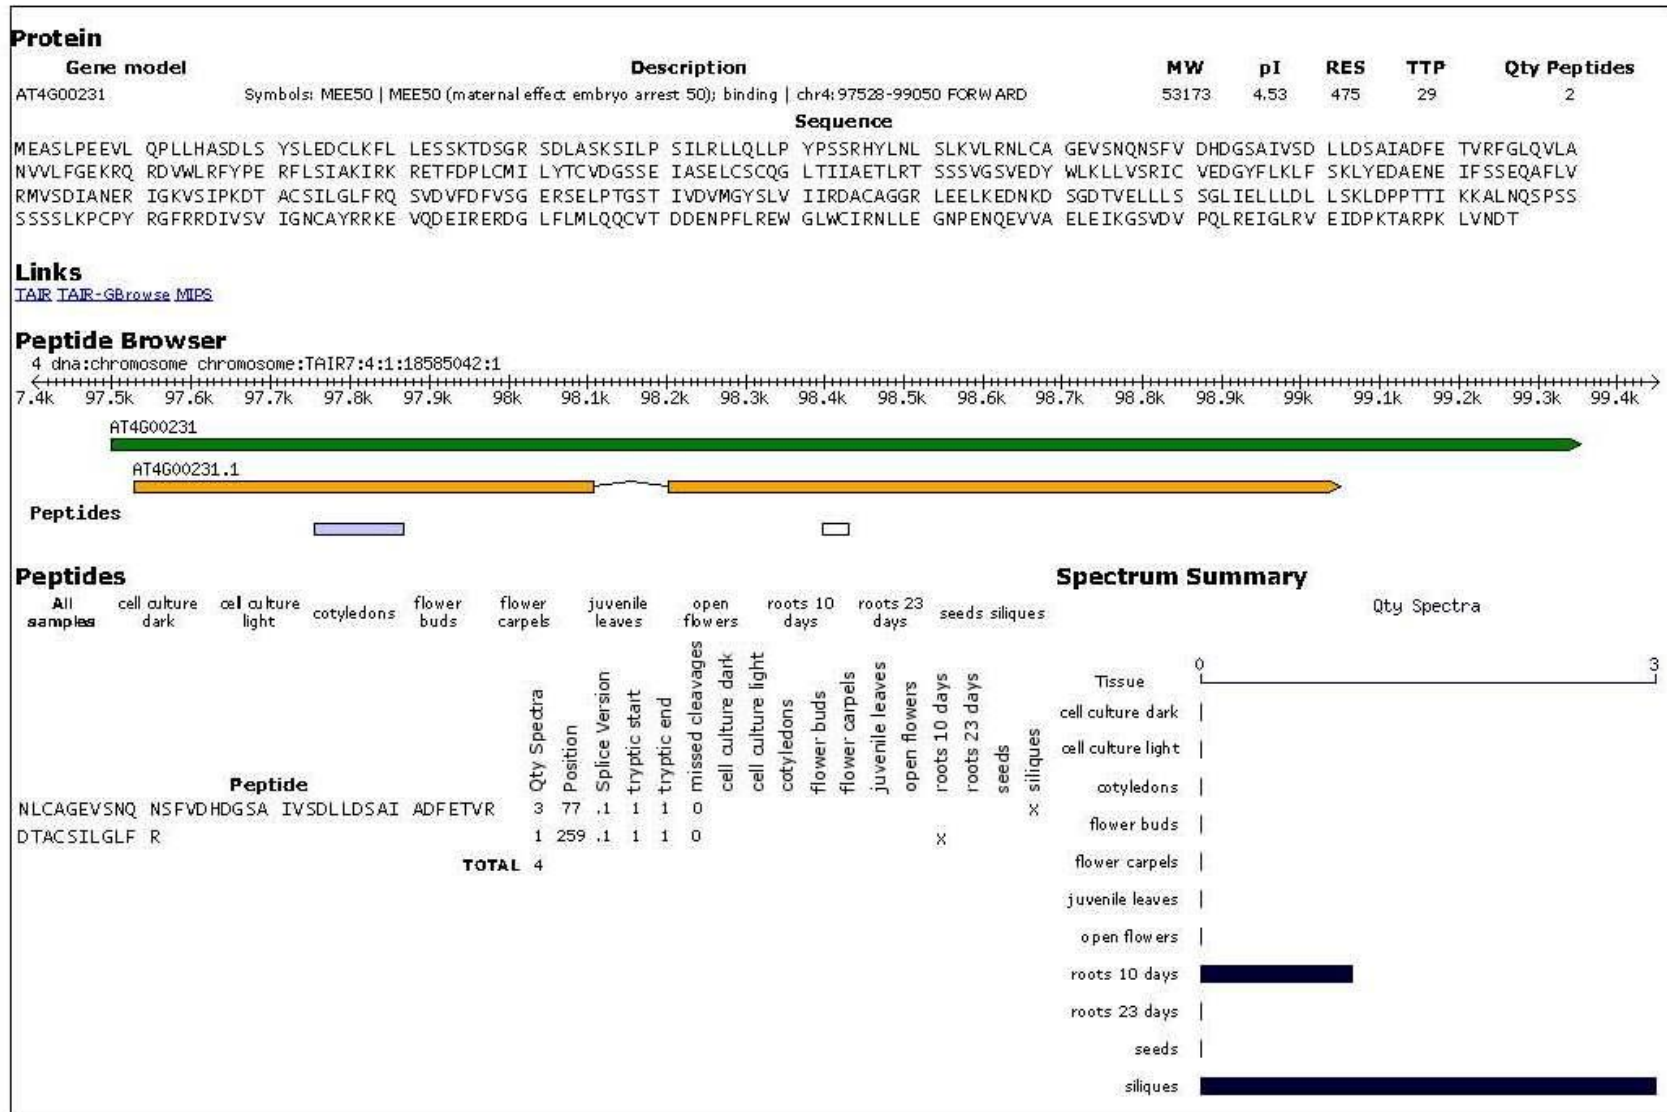



**Supplemental Figure 6.** *ZIX* promoter activities in early seeds

A-C: maternal *ZIX*:GUS. D-F: paternal *ZIX*:GUS. A,D: 4-cell embryo. B,E: 8-cell embryo. C,F: globular embryo. Scale bar: 20  $\mu$ m.

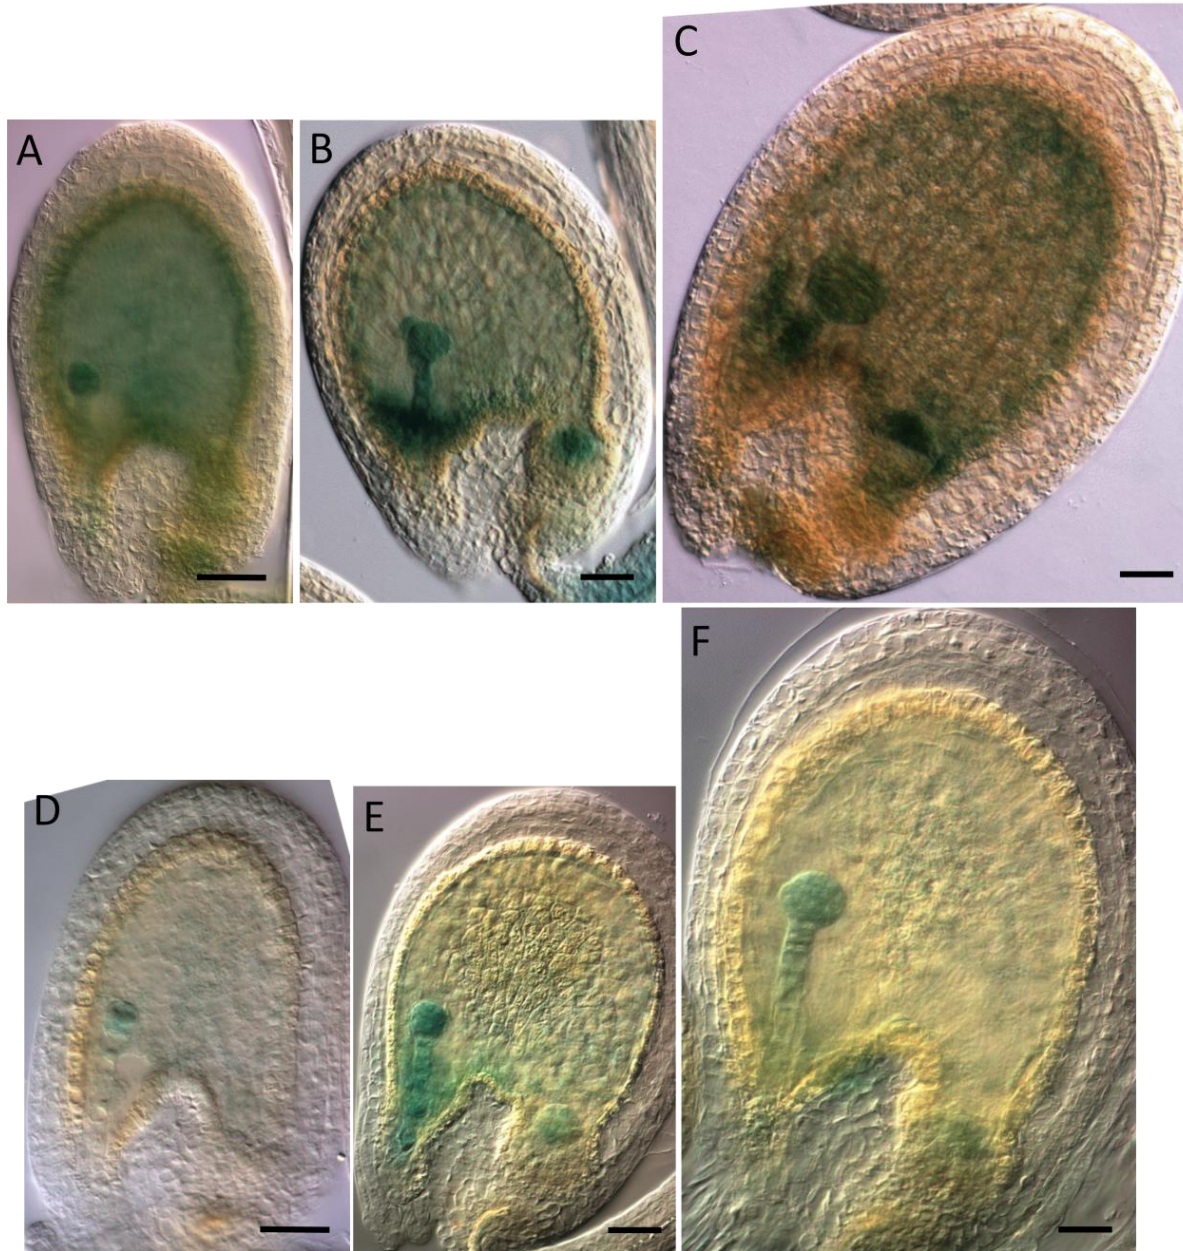

**Supplemental Figure 7.** Chromatin mark and small RNA distributions at *ZIX* locus from public databases.  
**A.** DNA cytosine methylation, small RNAs, and mRNAs in wild-type and mutant immature floral tissues.

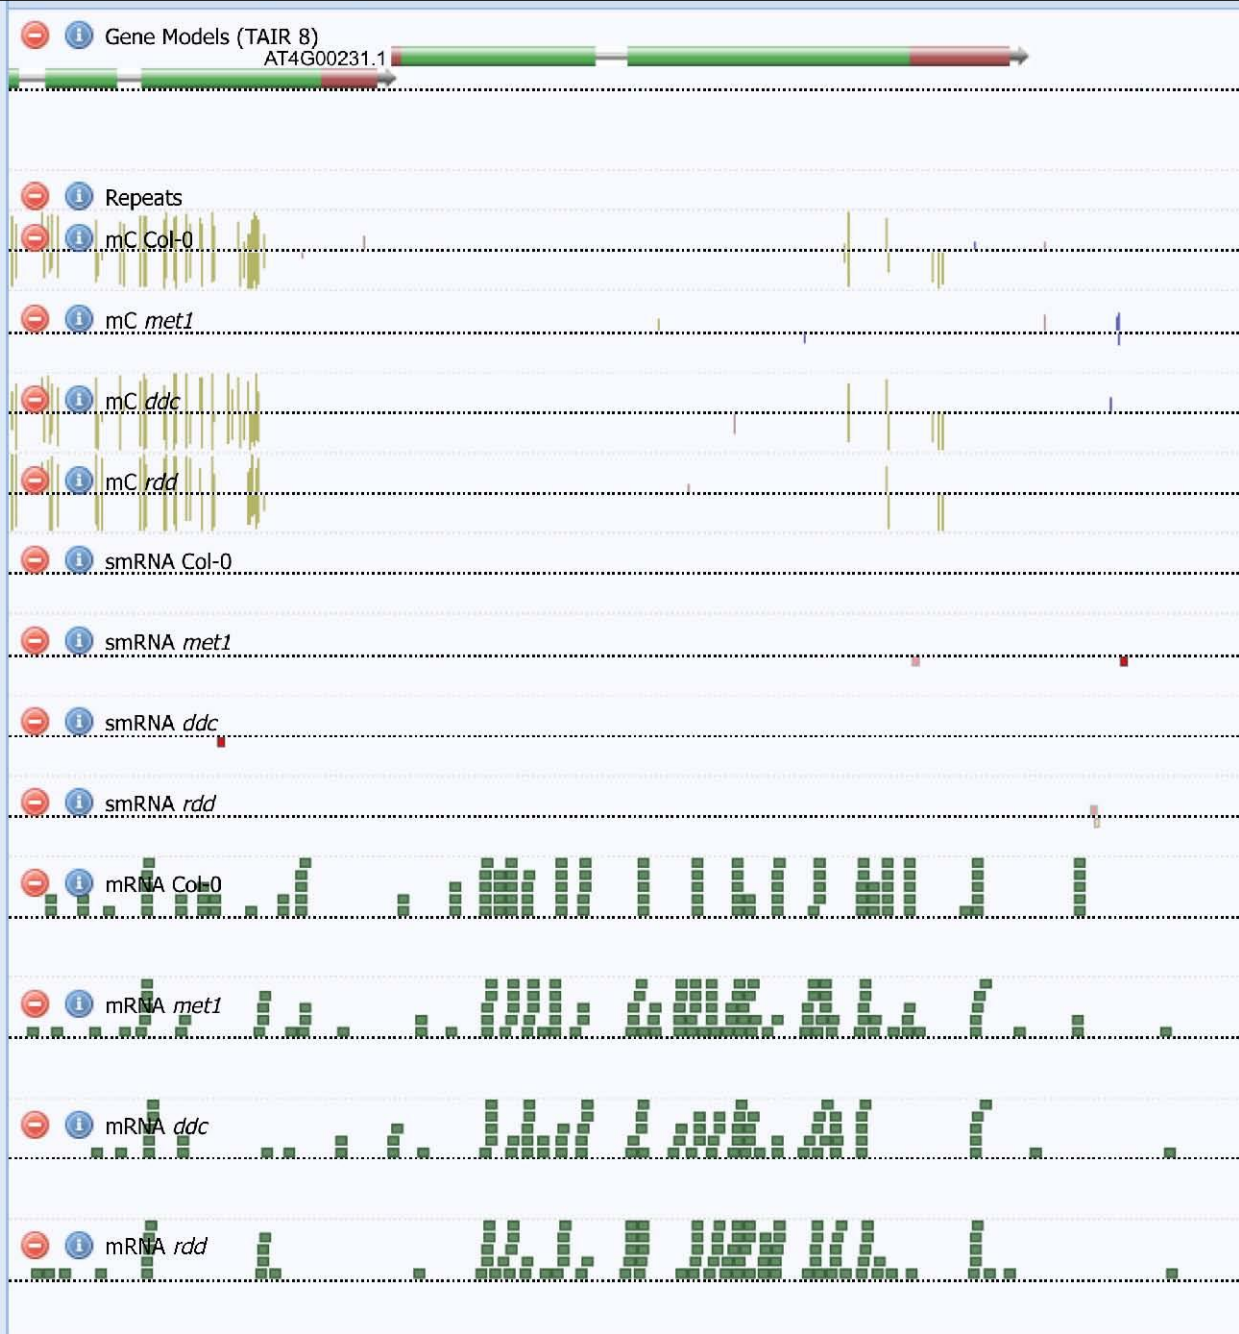

**mC:** methylated cytosine, **smRNA;** small RNAs, **ddc:** *drm1,drm2,cmt3*, **rdd:** *ros1,dml2,dml3*  
 yellow bars: CG, blue bars: CHG, red bars : CHH (absent from this locus)  
 green squares: RNA-sequencing reads.

Data were extracted from <http://neomorph.salk.edu/epigenome/epigenome.html>.

**Supplemental Figure 7** (cont.). Chromatin mark and small RNA distributions at *ZIX* locus obtained from public databases.

**B.** DNA cytosine methylation and histone methylation, acetylation and ubiquitylation marks compiled from multiple data sources at <http://epigara.biologie.ens.fr/cgi-bin/gbrowse/a2e/>.

Showing 4 kbp from Chr4, positions 96,426 to 100,425

**Instructions**

**Searching:** Search using a sequence name, gene name, locus, or other landmark. The wildcard character \* is allowed.

**Navigation:** Click one of the rulers to center on a location, or click and drag to select a region. Use the Scroll/Zoom buttons to change magnification and position.

**Examples:** AT1G01040, AT3G52910.1, Chr1:1504365..1514364, Chr4:1-25000, ChrC:63781..68780, At4g25530.

[Bookmark this] [Upload your own data] [Hide banner] [Share these tracks] [Link to Image] [High-res Image] [Help] [Reset]

**Search**

Landmark or Region:

Chr4:96426..100425

Data Source

EPIGARA [TAIR8]

**Overview**

Reports & Analysis:

Scroll/Zoom:      Show 4 kbp

**Details**

**DNA/GC Content**

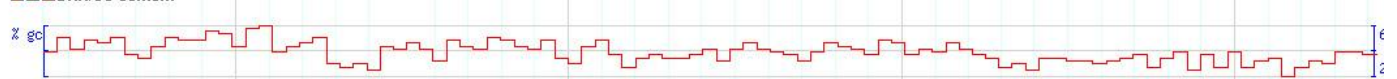

**Locus (gene, pseudogene, transposable\_element\_gene)**

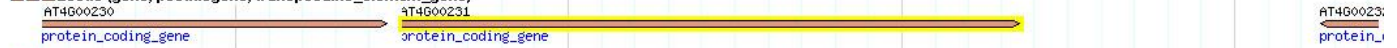

**Protein Coding Gene Models (mRNA)**

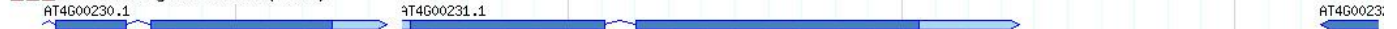

**CDS (protein)**

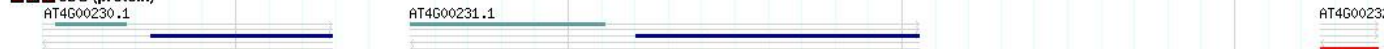

**Pseudogenes (pseudogenic\_transcript)**

**Noncoding RNAs (ncRNA, miRNA, tRNA, snoRNA, snRNA, rRNA)**

**Transposable Elements**

**Chromatin states (Chr4)**

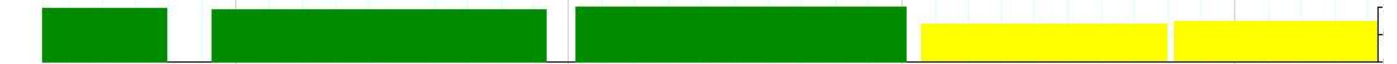

**H3K9me2 Col0 native - Bernatavichute et al. (2008)**

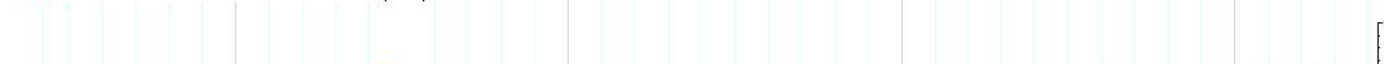

**H3K9me2 Col0 crosslinked - Bernatavichute et al. (2008)**

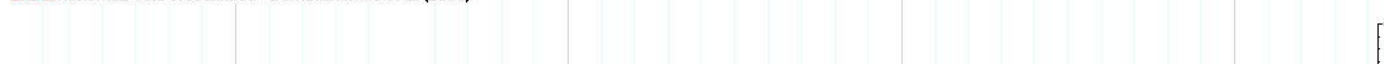

**H3K4me1 Col0 - Zhang et al. (2009)**

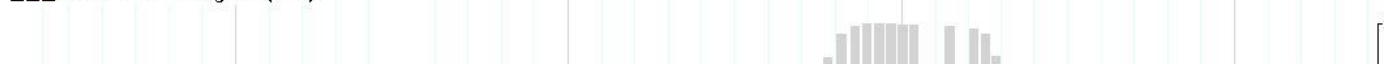

**H3K4me1 met1 - Zhang et al. (2009)**

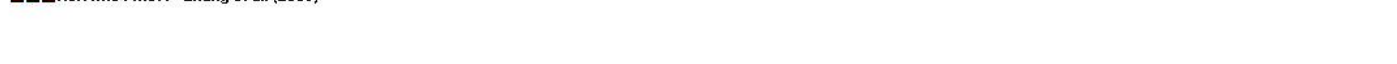



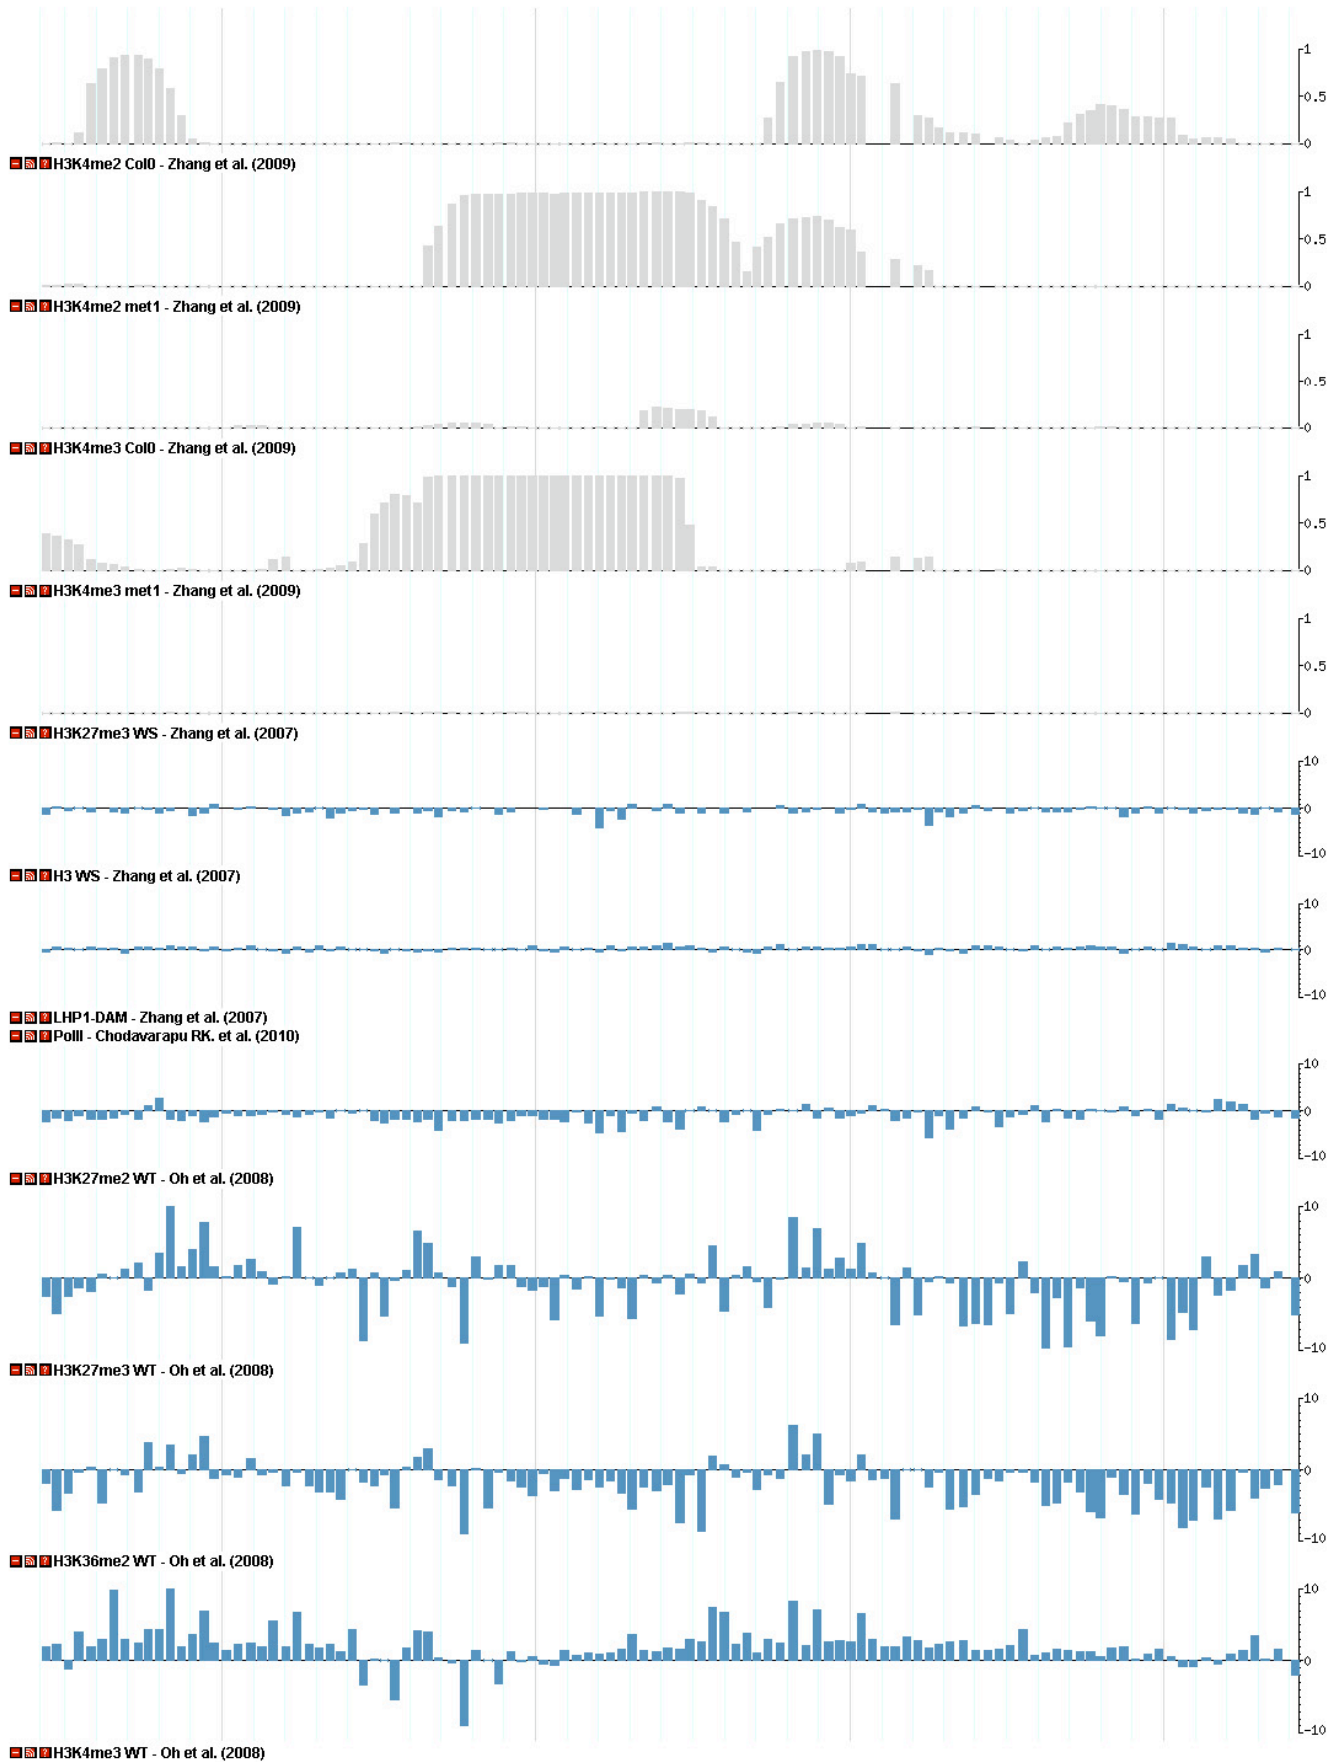

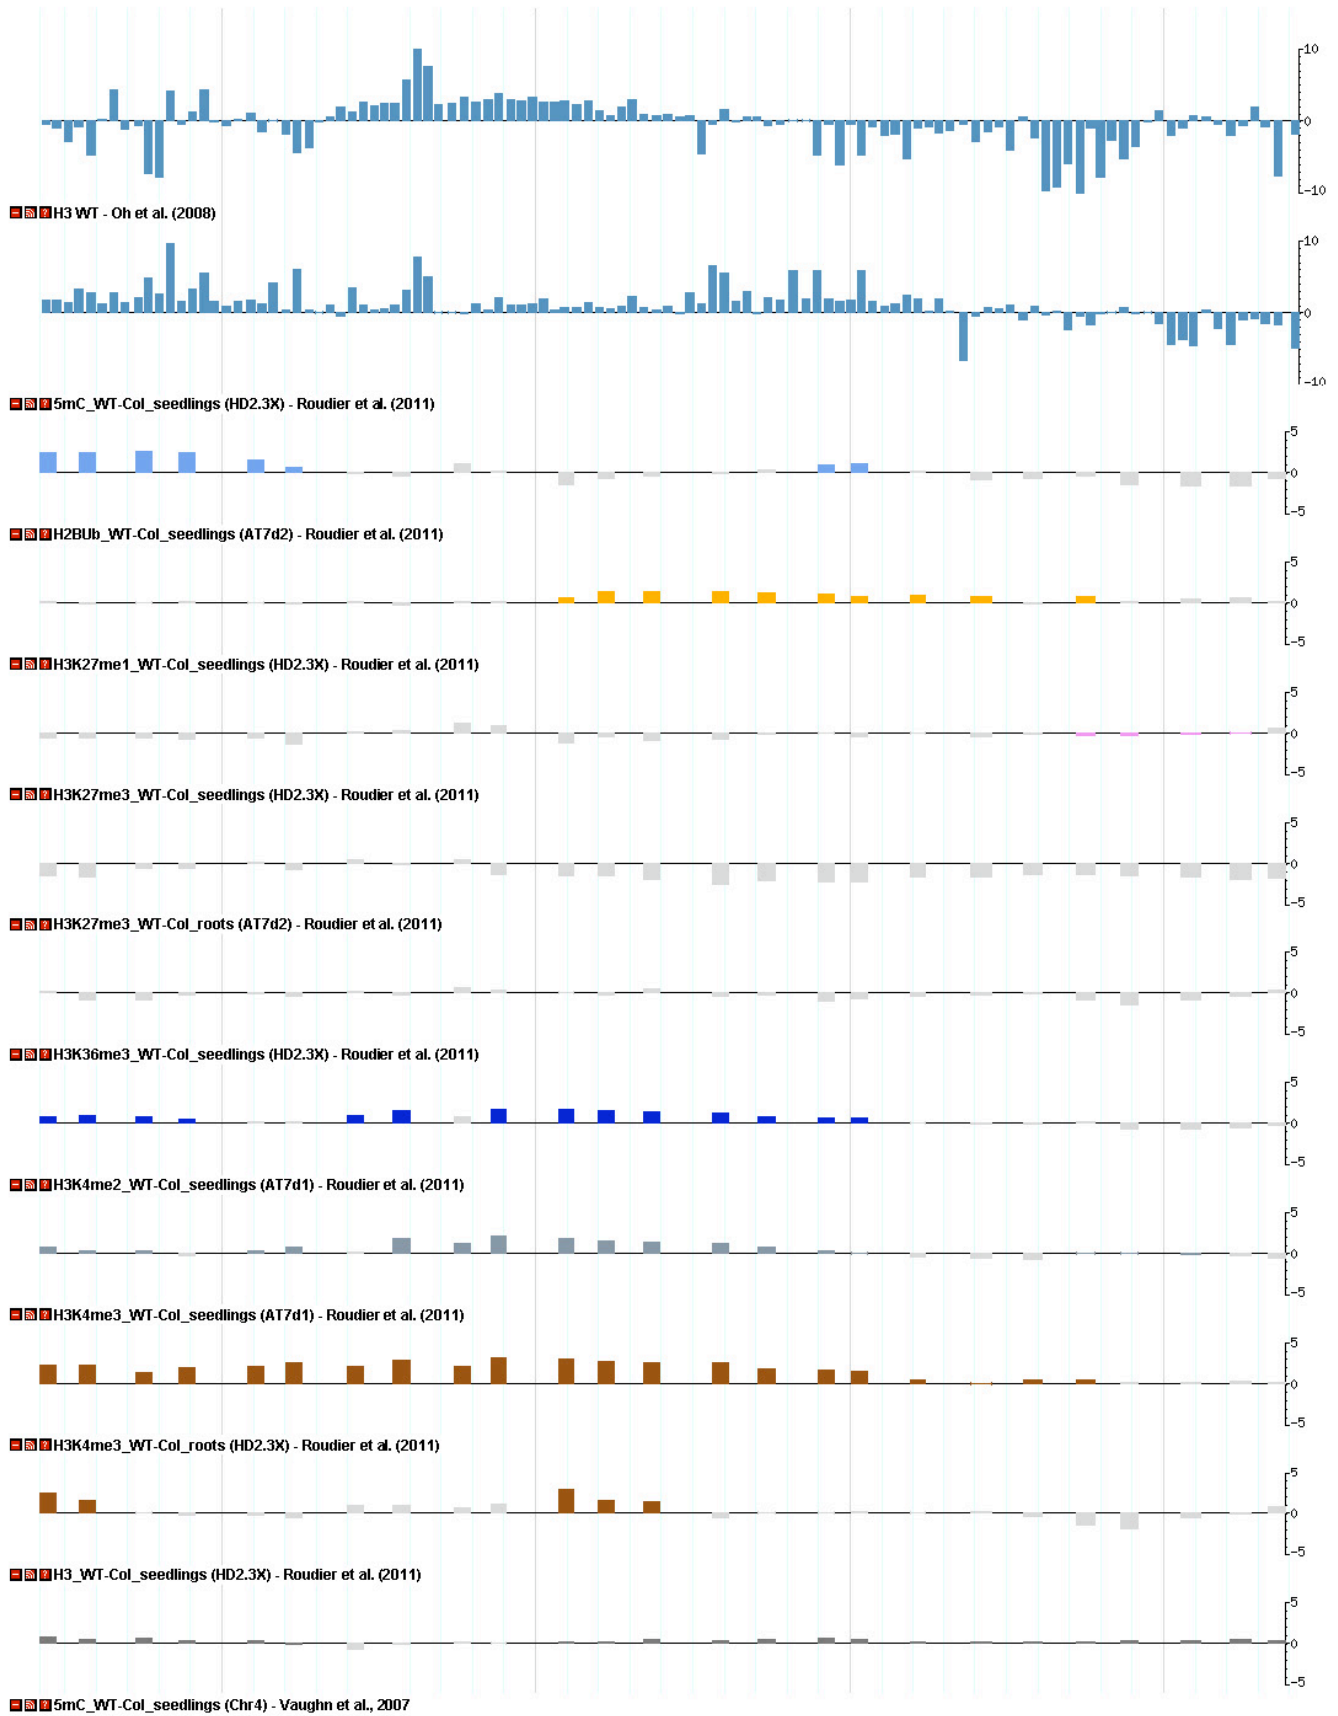

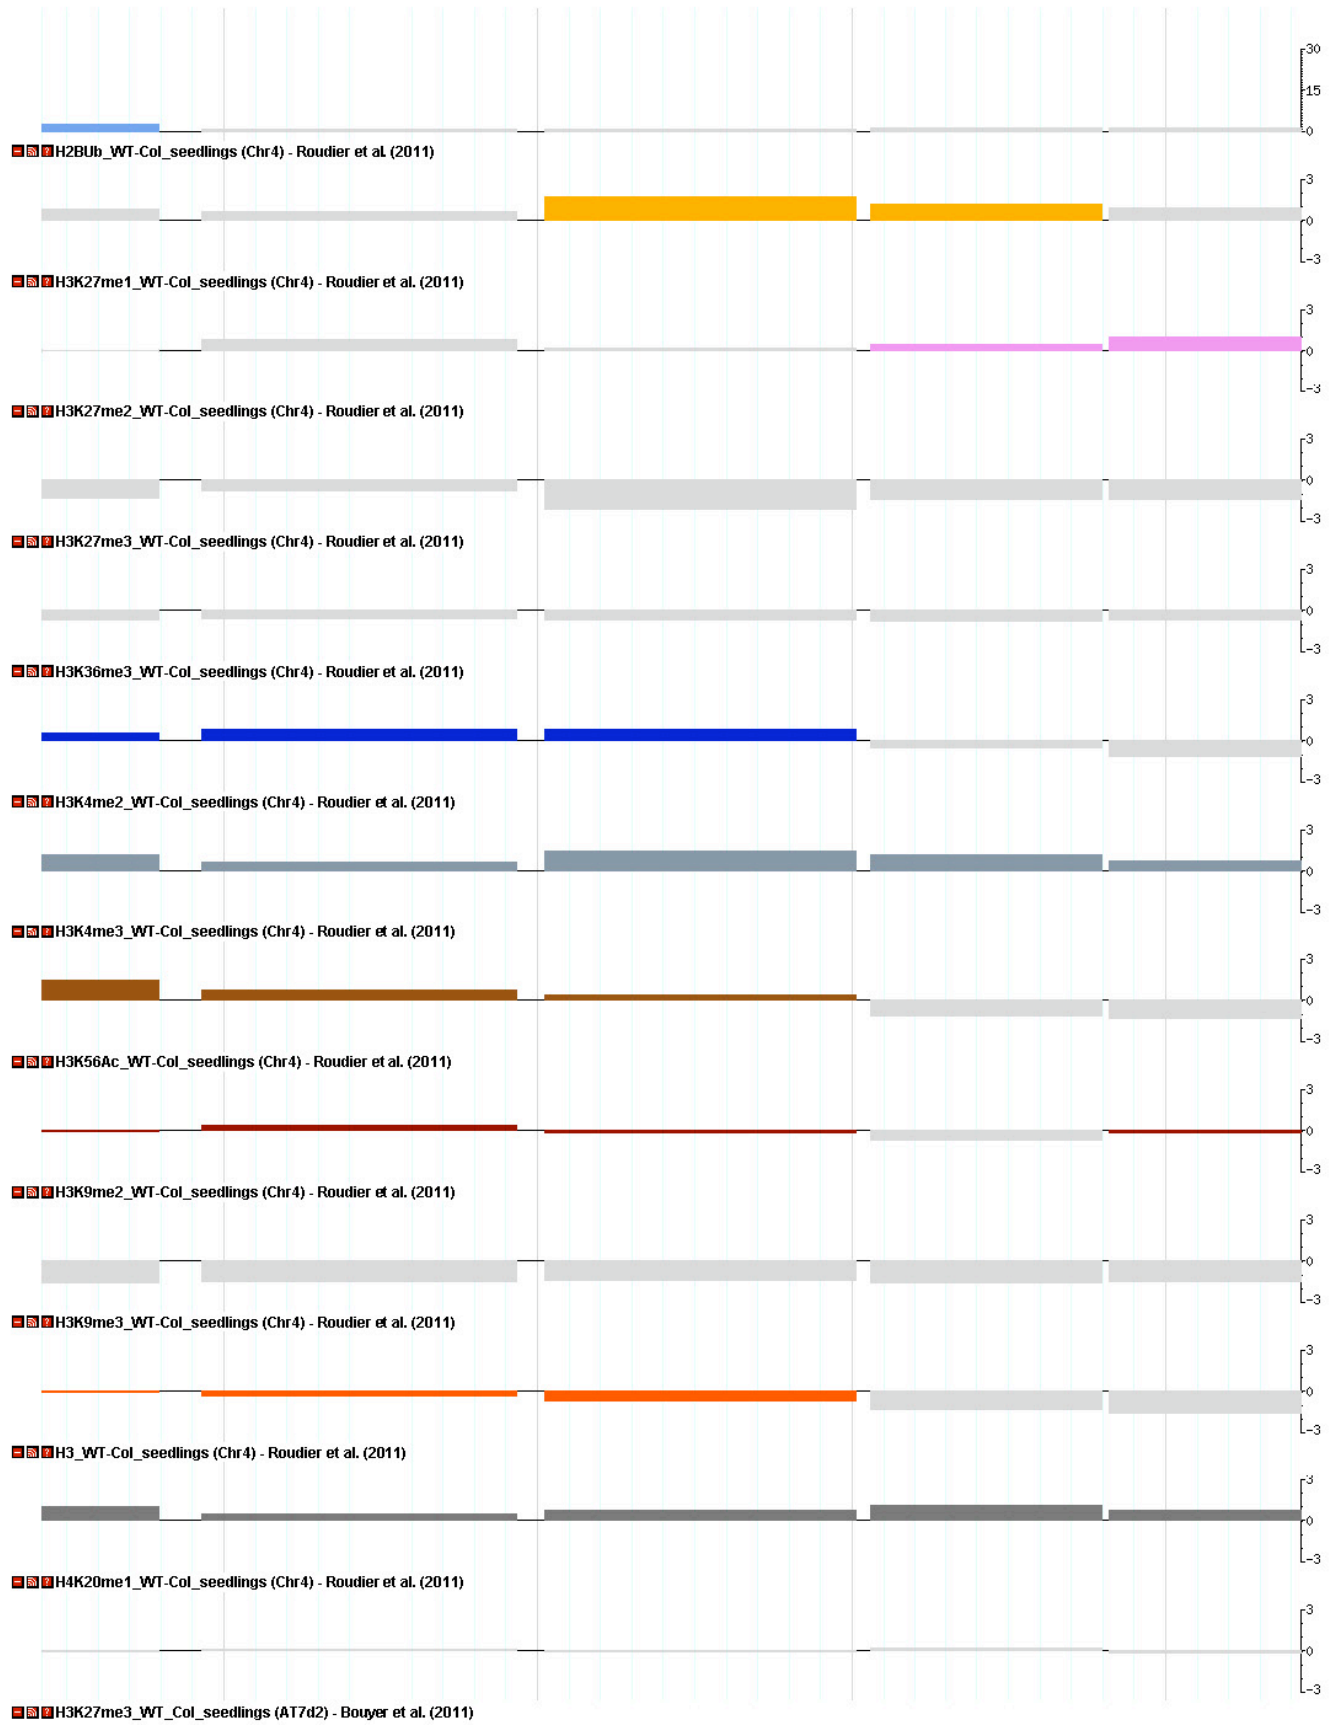





**Supplemental Figure 8.** ZIX-GFP protein localization in early seeds

DIC and GFP overlay images. A: 4-cell embryo. B: 8-cell embryo. C: early globular embryo. D: early heart stage embryo. Scale bar: 20  $\mu$ m.

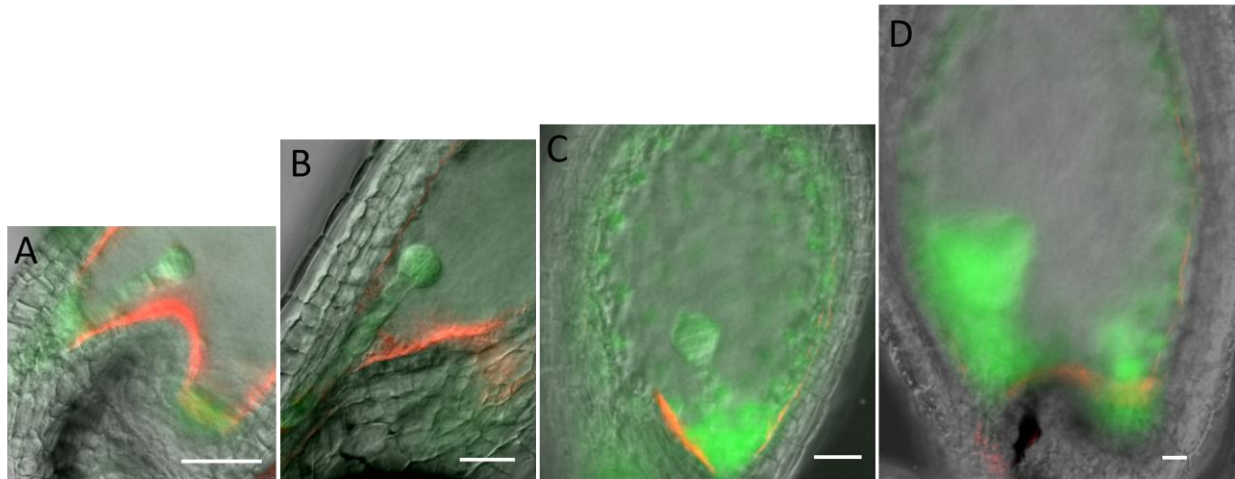

**Supplemental Figure 9.** Maternal *MINI3:GUS* expression in *zix* seeds

A: 1DAP wild-type (wt) seed. B-D: 2DAP *zix* seeds. Scale bar: 20  $\mu$ m.

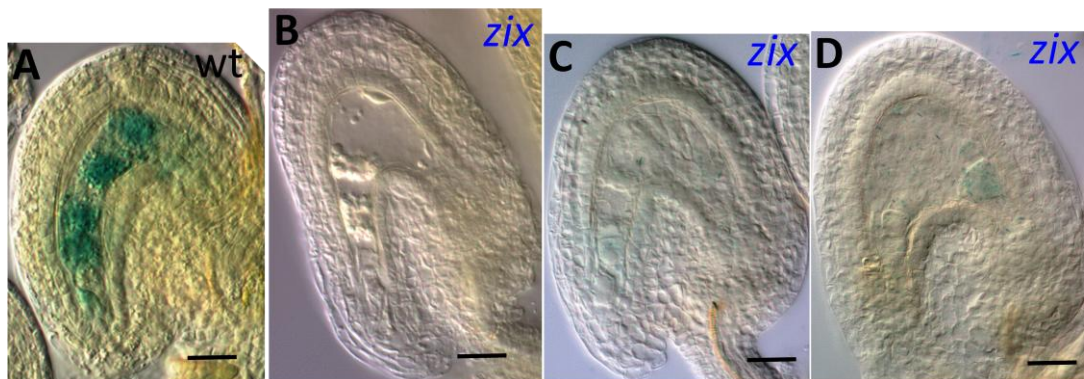

**Supplemental Table 1.** Primers and PCR parameters

| allele                           | primer                         | sequence (5' to 3')                  |
|----------------------------------|--------------------------------|--------------------------------------|
| <i>Ds</i> borders of             | Ds5-2                          | CGTCCGTTTTTCGTTTTTTACC               |
| all 3 <i>zix</i>                 | Ds3-2                          | CCGGTATATCCCGTTTTTCG                 |
| <i>zix-1</i>                     | SET2325 5'                     | ATTGCTTGAAATTTCTTCTAGAGTCTTC         |
|                                  | SET2325 3'                     | GCCCTTGACAGCTACAAAGC                 |
| <i>zix-2</i>                     | SET3862 5'                     | ACTGTCTCGAAATCCGCAAT                 |
|                                  | SET6076 3'                     | GTGGTGAAGGCCAAACAAT                  |
| <i>zix-3</i>                     | SGT8064 5'                     | CATCCTCACAAGAAAGGCTTG                |
|                                  | SET5779 3'                     | GGCCATTACACGAAACACT                  |
| <i>At4g00231</i>                 | LP <i>At4g00231</i> exon2 Dral | GTAGCTGTCAAGGGCTCACC                 |
| SNP                              | RP <i>At4g00231</i> exon2 Dral | TCAGGGTTCCCTTCCAGTAA                 |
| <i>Ler met1</i> &                | met1 For                       | CTCTTTAGTAGAAGTTGGCATG               |
| <i>Col met1</i>                  | met1 Rev                       | ATATGTATGTATAGATATTTTCTCC            |
| <i>Ler ddm1-2</i>                | DDM1f                          | CAGATCTCTACCCTCCTGT                  |
|                                  | ddm1-2dRsa                     | TGAGCTACGAGCCATGGGTTTGTGAAACGTA      |
| <i>Col ddm1-1</i>                | ddm1-1 for                     | TTTGAGGTTTGCAGAATCGATGGCA            |
|                                  | ddm1-1 rev                     | CCTATAAACATGAACAGGTTTCGTCTGCCCGAT    |
| <i>Ler cmt3-7</i>                | cmt3-7 for                     | TTGACTACCCCGGGAATGAACCCATTTGT        |
|                                  | cmt3-7 rev                     | GATCTGCAACAAATCTCAGC                 |
| <i>Lg At4g00231</i><br>transgene | ad1 gMEE                       | AAAAAGCAGGCTGCGGTCCAATCGCCGATTA      |
|                                  | ad2 gMEE                       | AGAAAGCTGGGTAGCATCATCATCCAGTTAGATGCT |
|                                  | attB1 for                      | GGGGACAAGTTTGTACAAAAAAGCAGGCT        |
|                                  | attB1 rev                      | GGGGACCACTTTGTACAAGAAAGCTGGGT        |
| <i>ZIX:ZIX-GFP</i>               | ad1 gMEE                       | AAAAAGCAGGCTGCGGTCCAATCGCCGATTA      |
|                                  | ad2 gMEEfuse                   | AGAAAGCTGGGTGGTGTTCATTGACAAGCTTTGG   |

All PCRs were carried out for 30 cycles, except for At4g00231 SNP, which was done for 35 cycles, at 94<sup>0</sup>C / 30 sec, 55<sup>0</sup>C / 30 sec, 72<sup>0</sup>C / 60 sec, with 94<sup>0</sup>C / 2 min at the beginning and 72<sup>0</sup>C / 3 min at the end. The annealing temperatures for *met1*, *ddm1-2*, and *ddm1-1* alleles were 45<sup>0</sup>C, 48<sup>0</sup>C, and 67<sup>0</sup>C, respectively. PCR parameters for amplifying the Lg *At4g00231* transgene were performed as recommended by the Gateway cloning protocol per manufacturer (Invitrogen, CA, USA).
